# Supplementary material
Source: Springer Nature journal article supplement (https://www.springermedizin.de/resource/supplementary/13012_2010_306_MOESM5_ESM.pdf/9629682)

**GMFM-88 Familiarity -- East**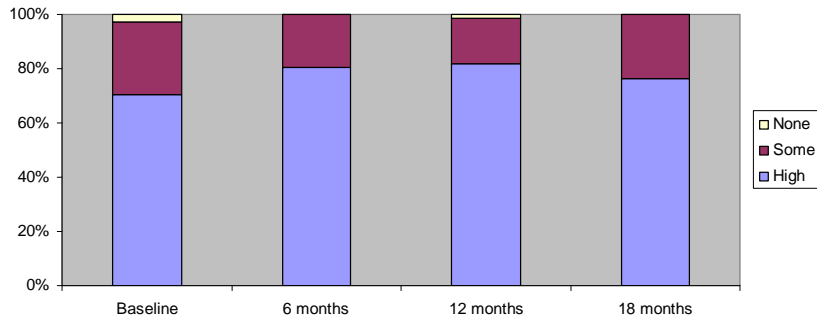**GMFM-88: Use -- East**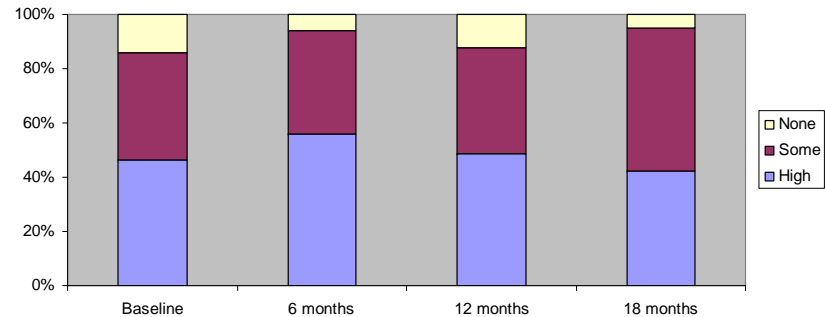**GMFM-88: Familiarity -- West**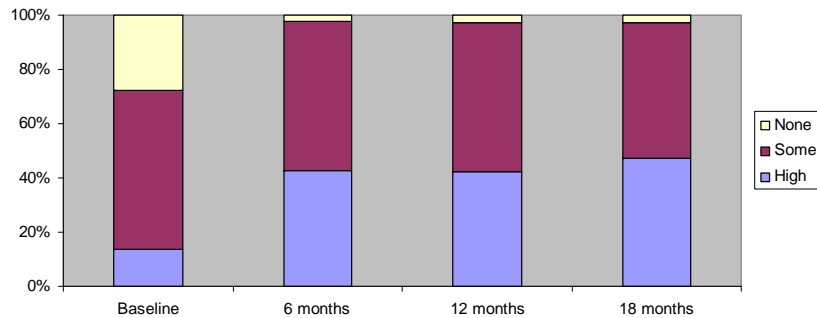**GMFM-88: Use -- West**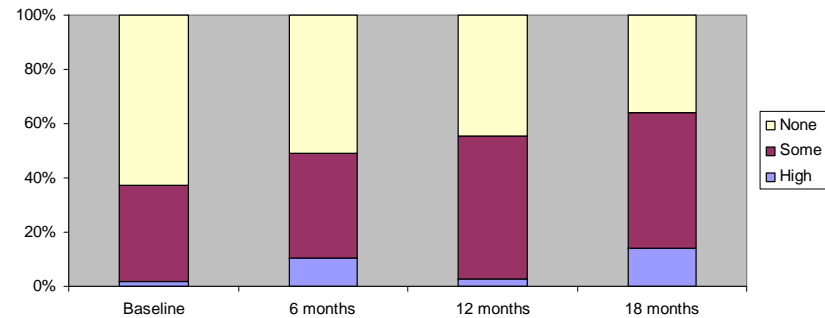

Supplement: MOESM5 [file 9629682]
